# Supplementary material
Source: PubMed Central journal article supplement (PMC5291012)
Supplement: supp_pp.16.00996_PP2016-00905DR1_Supplemental_Material.pdf [file supp_pp.16.00996_PP2016-00905DR1_Supplemental_Material.pdf]

## Supplementary Figures

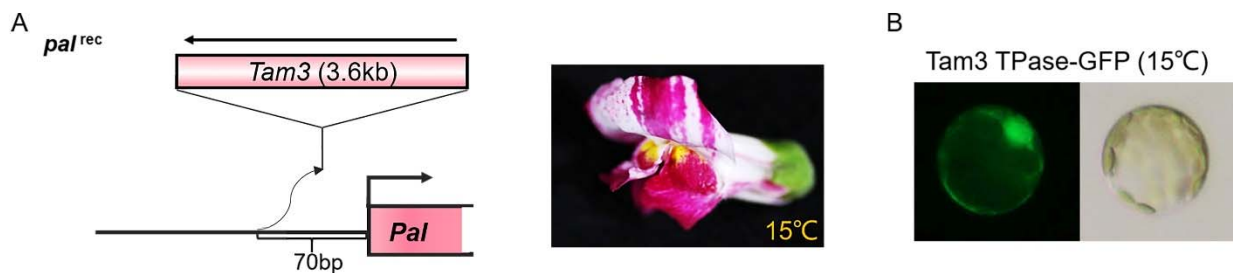

**Supplemental Figure S1** Phenotype of Tam3 temporarily inactive *Antirrhinum* Line at 15°C. A, Structure of the *pal* allele from *Antirrhinum majus* line HAM22 and its flower phenotype at 15°C. The transposition of Tam3 happened under low temperature in some *Antirrhinum* petal cells. In this case, Tam3 was removed from the promoter of *pal*. The expression of *pal* was recovered. Hence, the flower showed red spots in the petal. B, The subcellular localization of Tam3 TPase at 15°C in the protoplast of HAM22. Some of Tam3 TPase can go into the nuclei under low temperatures.

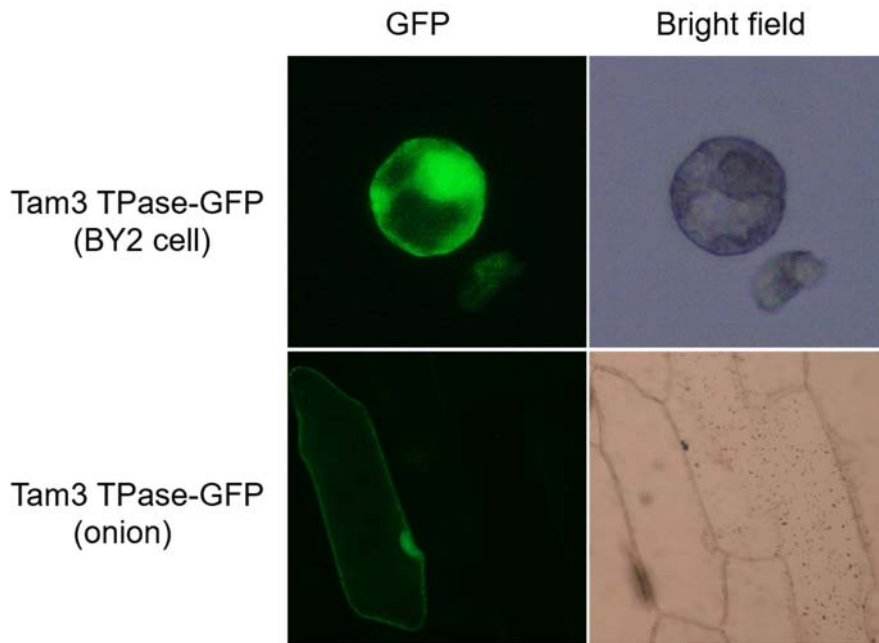

**Supplemental Figure S2** Subcellular localization of Tam3 TPase in tobacco BY2 cells and onion epidermis cells. Plasmid DNA was introduced into tobacco BY2 cells and onion epidermal tissues by the PEG-mediated way or the bombardment method, respectively. Then, the tissues were incubated at 25°C for 20 h. In these two plants, most of cells showed GFP signal at both cell membrane and nuclei.

## Supplementary Tables

**Supplemental Table S1** Measurements of the rate of plasma membrane-located GFP signal of intact- and truncated-Tam3 TPase in protoplasts and petal cells of HAM22.

| Subcellular localization of Tam3 TPases using protoplasts of HAM22 (25°C)                                               |          |          |          |
|-------------------------------------------------------------------------------------------------------------------------|----------|----------|----------|
| (numerator: number of cells showing only plasma membrane GFP localization; denominator: total number of cells with GFP) |          |          |          |
|                                                                                                                         | repeat 1 | repeat 2 | repeat 3 |
| T3TPase                                                                                                                 | 196/200  | 97/99    | 77/78    |
| T3TPase $\Delta$ 54                                                                                                     | 56/56    | 47/48    | 57/59    |
| T3TPase $\Delta$ 169                                                                                                    | 77/78    | 66/67    | 99/101   |
| T3TPase $\Delta$ 179                                                                                                    | 63/66    | 54/56    | 76/78    |
| T3TPase $\Delta$ 200                                                                                                    | 1/71     | 1/89     | 1/81     |
| T3TPase $\Delta$ 230                                                                                                    | 0/58     | 2/97     | 2/76     |
| T3TPase $\Delta$ 243                                                                                                    | 1/46     | 2/58     | 3/50     |
| Subcellular localization of Tam3 TPases using petal cells of HAM22 (25°C)                                               |          |          |          |
| (numerator: number of cells showing only plasma membrane GFP localization; denominator: total number of cells with GFP) |          |          |          |
|                                                                                                                         | repeat 1 | repeat 2 | repeat 3 |
| T3TPase                                                                                                                 | 89/89    | 52/52    | 105/105  |
| T3TPase $\Delta$ 54                                                                                                     | 62/62    | 58/58    | 69/69    |
| T3TPase $\Delta$ 169                                                                                                    | 51/51    | 54/54    | 68/68    |
| T3TPase $\Delta$ 179                                                                                                    | 39/39    | 38/38    | 42/42    |
| T3TPase $\Delta$ 200                                                                                                    | 10/43    | 2/51     | 5/26     |
| T3TPase $\Delta$ 230                                                                                                    | 8/49     | 0/36     | 3/39     |
| T3TPase $\Delta$ 243                                                                                                    | 15/76    | 16/48    | 2/46     |

**Supplemental Table S2** Measurements of the rate of plasma membrane-located GFP signal of pA7-(Znf-AmCSBL) and pA7-(Znf-DnaJh1) in protoplasts of HAM22.

| Subcellular localization of pA7-(Znf-AmCSBL) and pA7-(Znf-DnaJh1) using protoplasts of HAM22 (25°C)<br>(numerator: number of cells showing only plasma membrane GFP localization; denominator: total number of cells with GFP) |          |          |          |
|--------------------------------------------------------------------------------------------------------------------------------------------------------------------------------------------------------------------------------|----------|----------|----------|
|                                                                                                                                                                                                                                | repeat 1 | repeat 2 | repeat 3 |
| pA7-(Znf_BED&AmCSBL)                                                                                                                                                                                                           | 92/97    | 120/123  | 79/82    |
| pA7-(Znf_BED&AmDnaJh1)                                                                                                                                                                                                         | 48/49    | 49/51    | 31/32    |

**Supplemental Table S3** Measurements of the rate of plasma membrane-located GFP signal of intact- and mutated-Tam3 TPase in protoplasts HAM22.

| Subcellular localization of Tam3 TPase and its mutant constructs using protoplasts of HAM22 (25°C)                      |          |          |          |
|-------------------------------------------------------------------------------------------------------------------------|----------|----------|----------|
| (numerator: number of cells showing only plasma membrane GFP localization; denominator: total number of cells with GFP) |          |          |          |
|                                                                                                                         | repeat 1 | repeat 2 | repeat 3 |
| TPase(wt)                                                                                                               | 97/100   | 48/49    | 38/39    |
| TPase(m1)                                                                                                               | 36/48    | 29/43    | 21/34    |
| TPase(m2)                                                                                                               | 29/34    | 56/62    | 30/33    |
| TPase(m3)                                                                                                               | 44/54    | 55/72    | 48/61    |
| TPase(m4)                                                                                                               | 84/119   | 91/128   | 74/108   |
| TPase(m5)                                                                                                               | 4/60     | 5/55     | 21/80    |
| TPase(m6)                                                                                                               | 36/42    | 34/39    | 33/40    |
| TPase(m7)                                                                                                               | 19/96    | 28/112   | 8/38     |
| TPase(m8)                                                                                                               | 0/58     | 3/65     | 3/75     |
| TPase(m9)                                                                                                               | 19/98    | 21/106   | 19/105   |
| TPase(m10)                                                                                                              | 1/71     | 2/82     | 2/90     |

**Supplemental Table S4** Primers list of plasmid constructions.

| <b>primers for subcellular localization of Tam3 TPases</b>                                               |                                         |
|----------------------------------------------------------------------------------------------------------|-----------------------------------------|
| T3TPase(XhoI)-F                                                                                          | CCGCTCGAGCGGATGGCAAACGAAGAAAACCTCAAATC  |
| T3TPase $\Delta$ 55(XhoI)-F                                                                              | CCGCTCGAGCGGATGGACACGAGCAATATTCA        |
| T3TPase $\Delta$ 170(XhoI)-F                                                                             | CCGCTCGAGCGGATGGCCTCTACATCAAGACC        |
| T3TPase $\Delta$ 179(XhoI)-F                                                                             | CCGCTCGAGCGGATGACGAAGAAAGCGACGGTA       |
| T3TPase $\Delta$ 200(XhoI)-F                                                                             | CCGCTCGAGCGGATGTTACTTTGTCTTACAAG        |
| T3TPase $\Delta$ 231(XhoI)-F                                                                             | CCGCTCGAGCGGATGGACGCTCCGGATATGCA        |
| T3TPase $\Delta$ 244(XhoI)-F                                                                             | CCGCTCGAGCGGATGGCACCGTGGAGGTATGACCAAAAT |
| T3TPase(SpeI)-R                                                                                          | GGACTAGTCCGTGGATGTTTGTAATAATCATATGGC    |
| <b>primers for subcellular localization of <i>AmCSBL</i> and <i>AmDnaJh1</i></b>                         |                                         |
| AmDnaJh1(XhoI)-F                                                                                         | CCGCTCGAGCGGATGGCCATCATTCCTTGTGGA       |
| AmDnaJh1(SpeI)-R                                                                                         | GGACTAGTCCCCTACTACTGGGAGCCTTC           |
| AmCSBL(XhoI)-F                                                                                           | CCGCTCGAGCGGATGGGTAGTGCTTCATCAATG       |
| AmCSBL(SpeI)-R                                                                                           | GGACTAGTCCGTCAATGGGGACTTCCATC           |
| <b>primers for inserting BED-zinc finger motif into N-terminals of <i>AmCSBL</i> and <i>AmDnaJh1</i></b> |                                         |
| T3TPase $\Delta$ 170(XhoI)-F                                                                             | CCGCTCGAGCGGATGGCCTCTACATCAAGACC        |
| Znf_BED&AmDnaJh1-F                                                                                       | GACAACCAGACGGTACAATGGCCATCATTCCTTG      |
| Znf_BED&AmDnaJh1-R                                                                                       | CAAGGAATGATGGCCATTGTACCGTCTGGTTGTC      |
| Znf_BED&AmCSBL-F                                                                                         | GACAACCAGACGGTACAATGGGTAGTGCTTCATC      |
| Znf_BED&AmCSBL-R                                                                                         | GATGAAGCACTACCCATTGTACCGTCTGGTTGTC      |
| <b>primers for point mutations</b>                                                                       |                                         |
| T3TPase(XhoI)-F                                                                                          | CCGCTCGAGCGGATGGCAAACGAAGAAAACCTCAAATC  |
| T3TPase(SpeI)-R                                                                                          | GGACTAGTCCGTGGATGTTTGTAATAATCATATGGC    |
| T3TPase(m1)-F                                                                                            | CTGGGCTCAGCGTTTACTTTGTCTTACAAG          |
| T3TPase(m1)-R                                                                                            | CTTGTAGGACAAAGTAAACGCTGAGCCCAG          |
| T3TPase(m2)-F                                                                                            | CTGGGCTCAGTGTACTTTCGTCCTACAAG           |
| T3TPase(m2)-R                                                                                            | CTTGTAGGACGAAGTAAACACTGAGCCCAG          |
| T3TPase(m3)-F                                                                                            | GAACACTTACAAGAAATTTGACGGCAAAG           |
| T3TPase(m3)-R                                                                                            | CTTTGCCGTCAAATTTCTTGTAAGTGTTT           |
| T3TPase(m4)-F                                                                                            | CATTTGACGGCAAAGAATAAGAATCGCGAC          |
| T3TPase(m4)-R                                                                                            | GTCGCGATTCTTATTCTTTGCCGTCAAATG          |
| T3TPase(m5)-F                                                                                            | CTGGGCTCAGCGTTTACTTTCGTCCTACAAG         |
| T3TPase(m5)-R                                                                                            | CTTGTAGGACGAAGTAAACGCTGAGCCCAG          |
| T3TPase(m6)-F                                                                                            | GAACACTTACAAGAAATTCGACGGCAAAG           |
| T3TPase(m6)-R                                                                                            | CTTTGCCGTCAATTTCTTGTAAGTGTTT            |
| T3TPase(m7)-F                                                                                            | GAAAGCGACGGTATCGAAATGGTTTTT             |
| T3TPase(m7)-R                                                                                            | GAAAACCATTTTCGATACCGTCGCTTTT            |
| T3TPase(m8)-F                                                                                            | TATGGAAATGGTCTTCAAAGGTGAC               |
| T3TPase(m8)-R                                                                                            | GTCACCTTTGAAGACCATTTCATA                |
| T3TPase(m9)-F                                                                                            | TGAAAGCGACGGCATGGAAATGG                 |
| T3TPase(m9)-R                                                                                            | CCATTTCCATGCCGTGCTTTTCA                 |
